# Supplementary material
Source: MDPI journal article supplement (https://www.mdpi.com/2504-3129/2/4/32)
Supplement: s1 [file s1]

# Changes in BNR microbial community in response to different selection pressure

Roya Pishgar <sup>1,2,\*</sup>, John Albino Dominic <sup>1</sup>, Joo Hwa Tay <sup>1</sup>, and Angus Chu <sup>1</sup>

<sup>1</sup> Department of Civil Engineering, University of Calgary, Calgary, Canada

<sup>2</sup> Associated Engineering Alberta Ltd., 400-600 Crowfoot Cres NW, Calgary AB T3G 0B4

\*Corresponding author (email: [roya.pishgar@ucalgary.ca](mailto:roya.pishgar@ucalgary.ca))

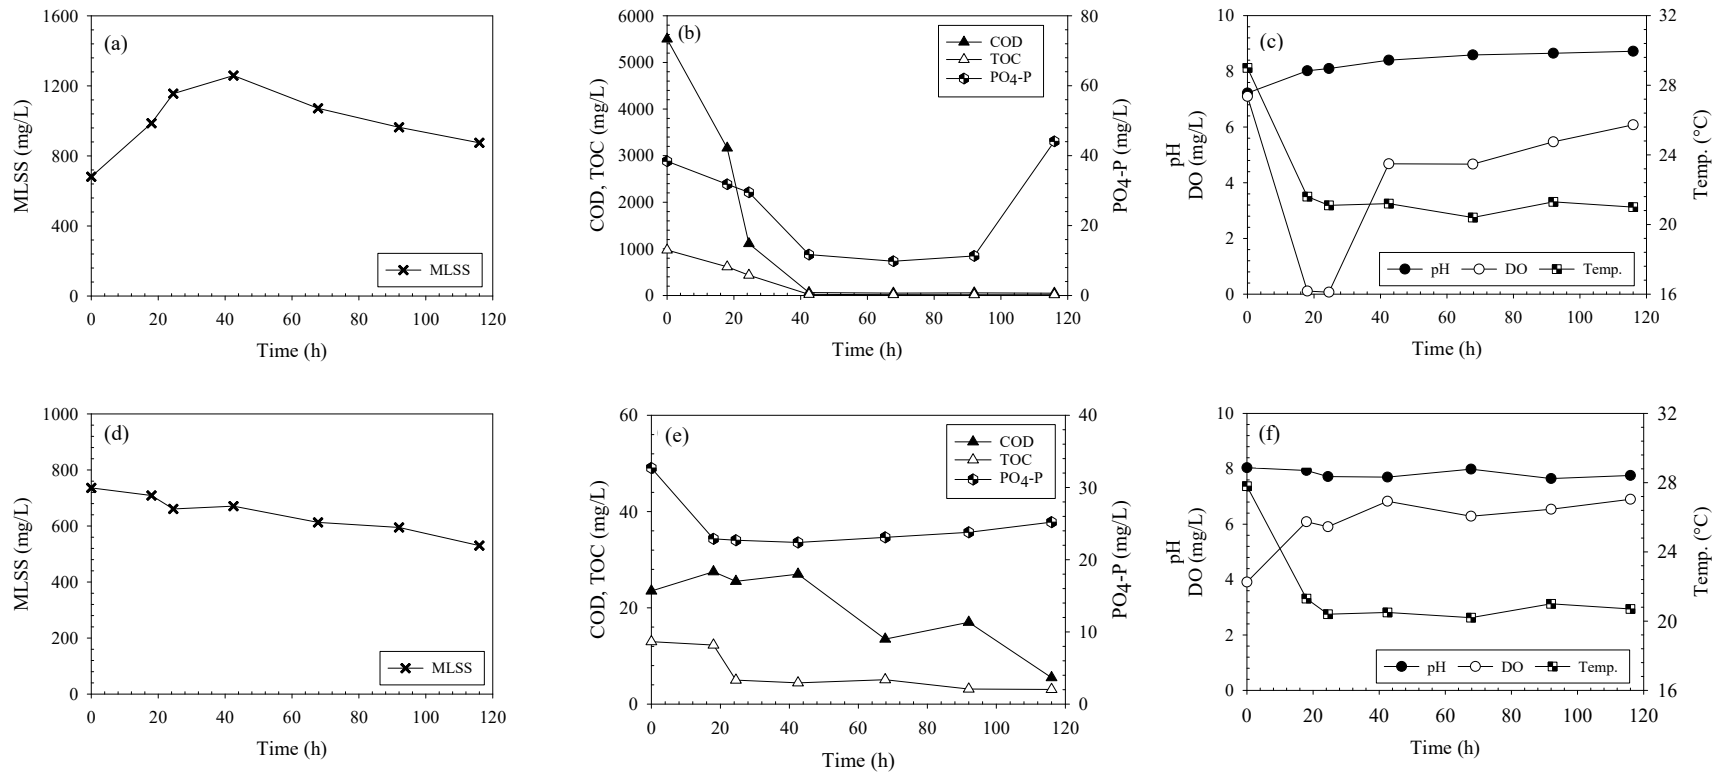

**Fig. S1.** Concentration profiles of soluble constituents, biomass, and environmental factors in (a – c) heterotrophic nitrification (HN) and (d – f) autotrophic nitrification (AN) suspended-biomass batch bioreactors

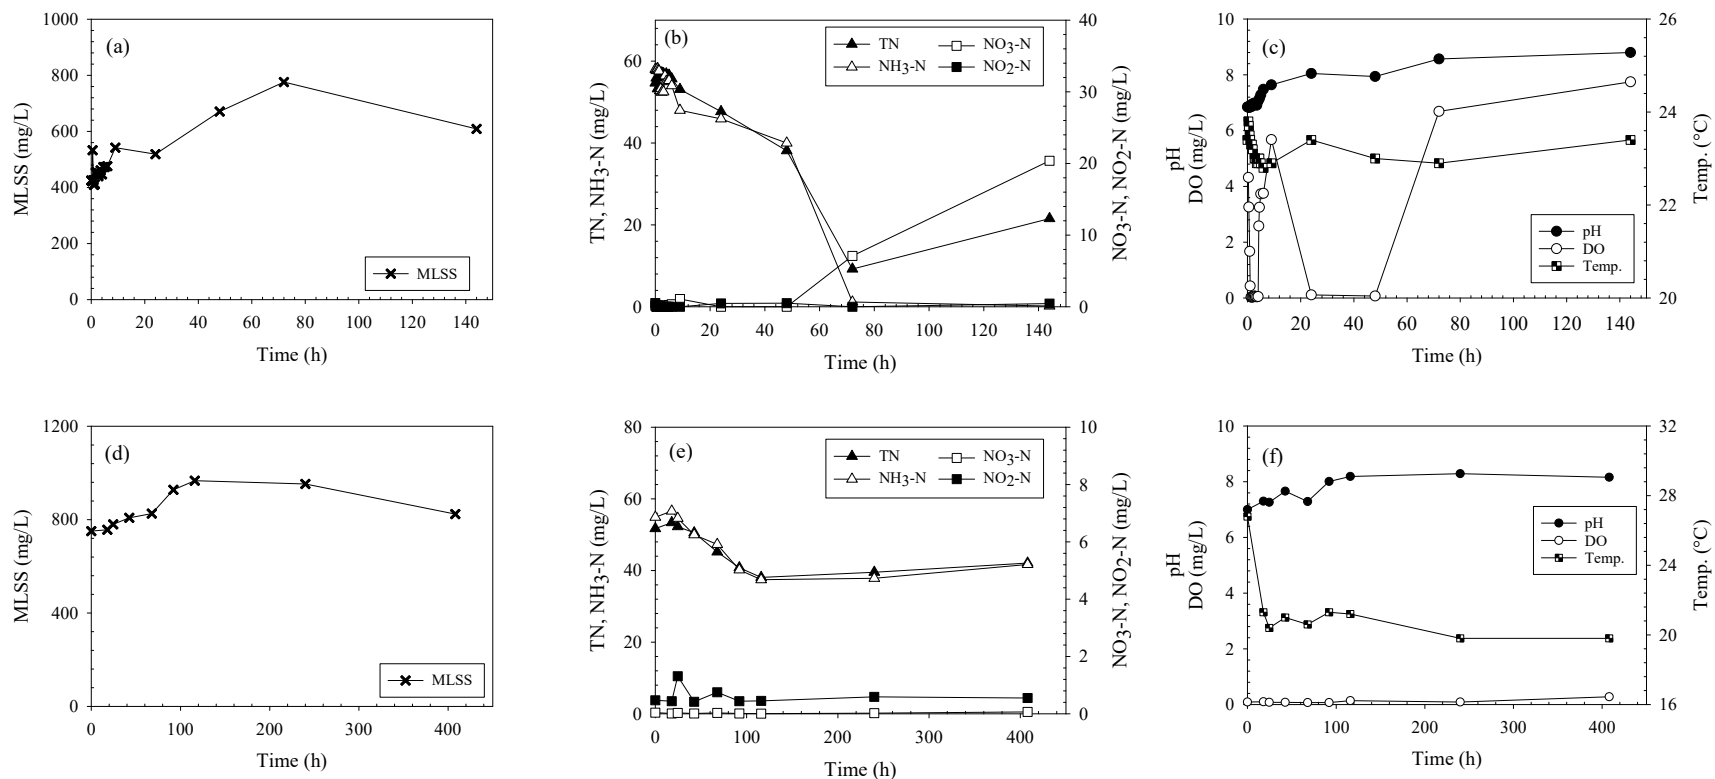

**Fig. S2.** Concentration profiles of soluble constituents, biomass, and environmental factors in (a – c) alternating anaerobic/aerobic (BioP\_AN/O) and (d – f) extended biomass (BioP\_ExAN) suspended-biomass batch bioreactors

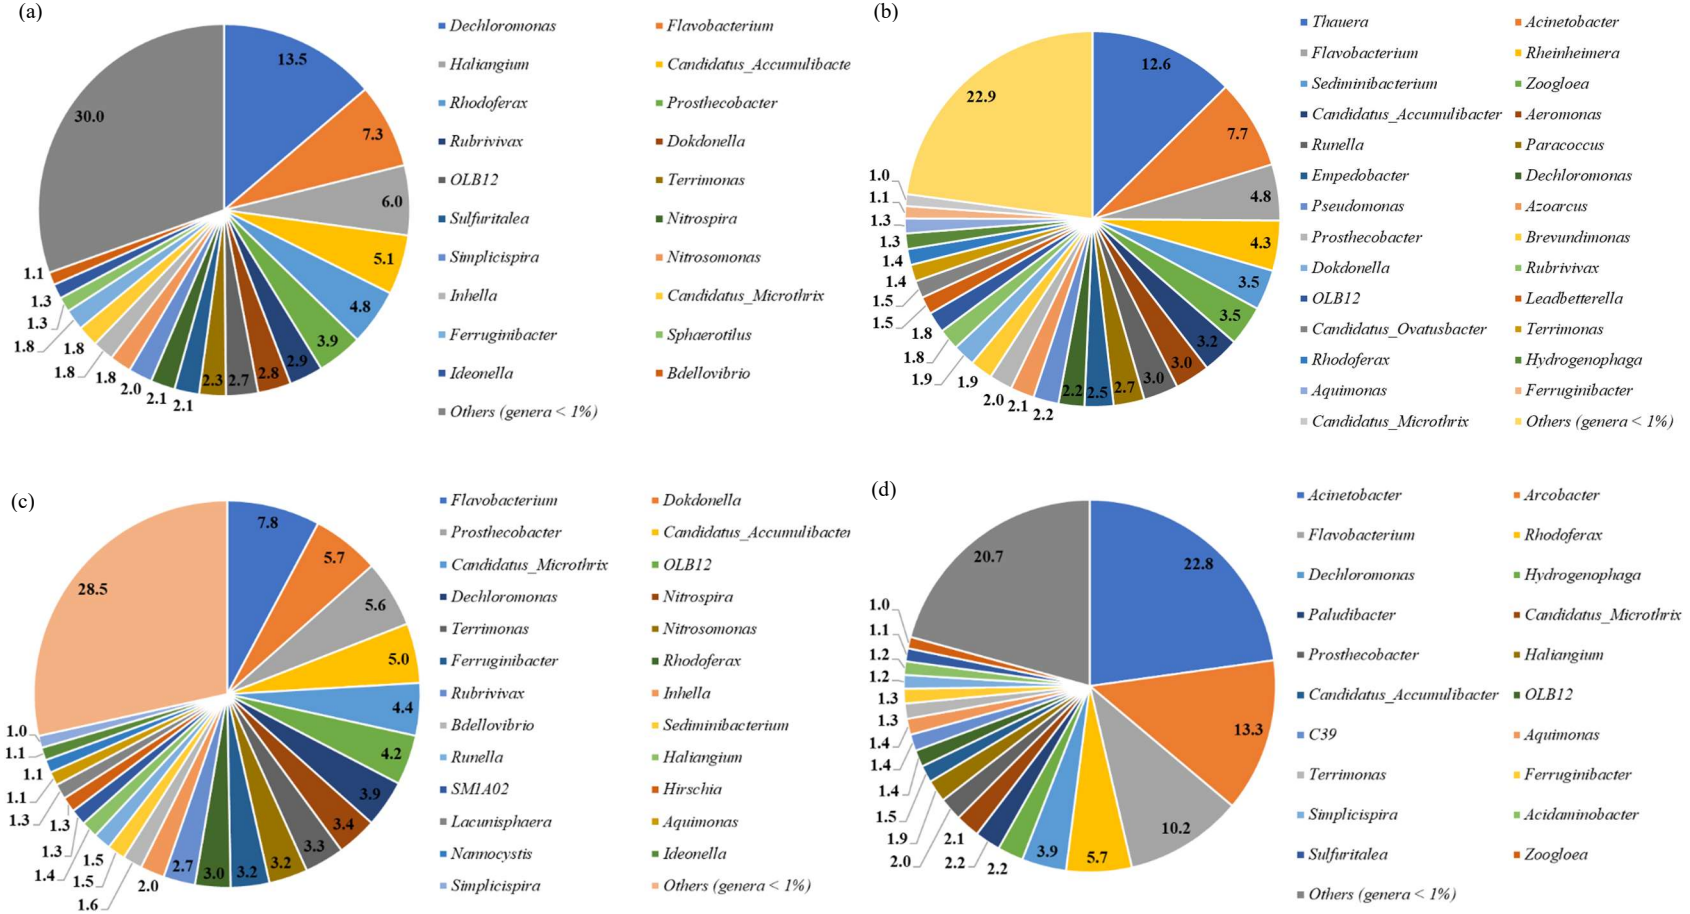

**Fig. S3.** Bacterial assembly of (a) inoculum; (b) heterotrophic nitrification (HN) AS biomass; (c) autotrophic nitrification (AN) AS biomass; (d) extended anaerobic (BioP\_ExAN) AS biomass; (e) alternating (AN/O/AX/O\_SBR) granular (AGS) biomass; and (f) purely aerobic (O\_SBR) granular (AGS) biomass at genus level (relative abundances  $\geq 1\%$ )

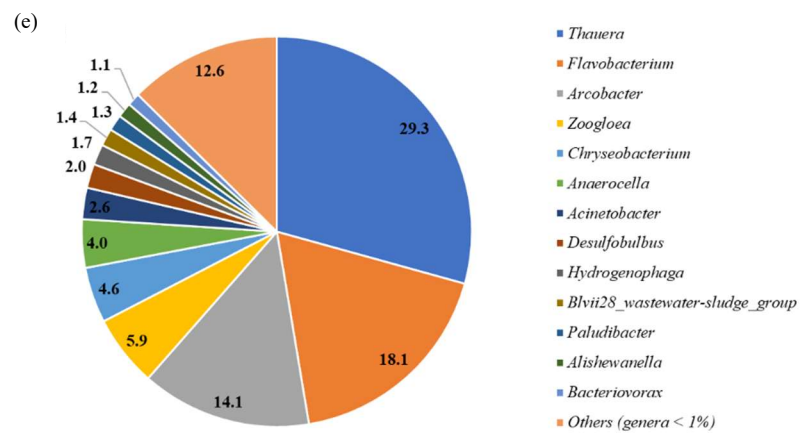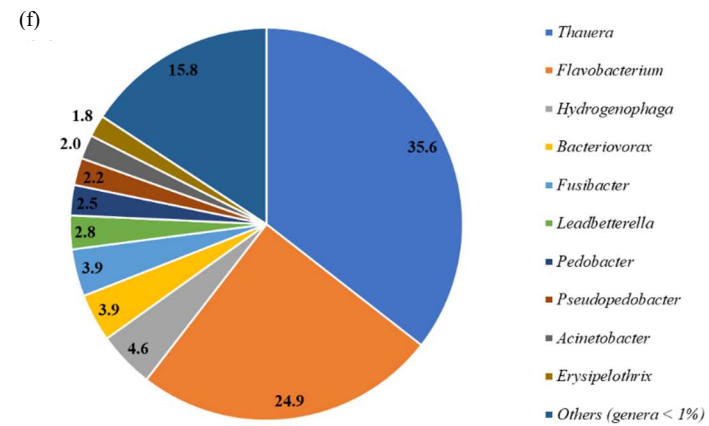

Fig. S3. Cont'd
